# Supplementary material
Source: PubMed Central journal article supplement (PMC5752264)
Supplement: jciinsight-2-97381-s001.pdf [file jciinsight-2-97381-s001.pdf]

## **Supplementary Materials**

### **Materials and Methods**

Pulmonary Function: Lung mechanics were assessed in anesthetized mice using the flexiVent mechanical ventilator system (SCIREQ, Montreal, PQ, Canada) as previously described (1). Mice were anesthetized with ketamine/xyloxine/acepromazine i.p., tracheostomized with a 20-gauge luer stub (Insetech, Plymouth Meeting, PA), and connected to the flexiVent. Mechanical ventilation was set at 150 breath/minute with tidal volume of 0.16 ml/kg. Lung mechanics including airway resistance, airway elastance, compliance, tissue elastance, and tissue damping were measured.

Immunoblots: Whole lungs were homogenized in PBS containing protease inhibitor cocktails. Protein (30µg) was analyzed by SDS-PAGE/Western blot under non-reduced (SP-B) and reduced (SP-C) conditions with antibodies against mature SP-B (1:5,000; WRAB-48604; Seven Hills Bioreagents), mature SP-C (1:15,000; WRAB-76694; Seven Hills Bioreagents), and a loading control GAPDH (1:10,000; A300-641A; Bethyl Laboratories).

Proteomics analysis: BALF proteins were extracted as previously described (2). Isolated BALF proteins were denatured, alkylated, digested with trypsin and desalted on a C18 SPE cartridge as previously described (2). Peptides were evaluated by LC-ESI-MS/MS using a Waters nanoACQUITY UPLC system interfaced with a Q Exactive mass spectrometer (Thermo Scientific, San Jose, CA). The LC-MS/MS system for proteomics was as previously described (2). Mass spectrometric raw data were analyzed in MaxQuant, version 1.5.2.8. with a false discovery rate set at 0.01(3). Proteins were identified with at least 2 peptides by searching against the Mus

musculus Uniprot database (UniprotKB, downloaded in 2015). Carbamidomethylation was set as fixed modification and N-terminal acetylation and oxidation of methionine were included as dynamic modifications. LFQ quantification (4) was used for protein quantification.

Morphometric analyses: Nikon Elements 4.50 was used to calculate the width and mean chord length of alveolar walls. RGB General Analysis algorithms were created using HSI mode. All images were white balanced by auto contrast to ensure all white airspaces were excluded from acceptance into the alveolar wall. In HIS mode, all hues (H, 0-255) and saturations (S, 0-255) were accepted allowing all colors to be included in the alveolar wall space. Only high intensities were excluded by selecting intensities from 0-215, eliminating airspaces from calculated data. Alveolar width is defined as the distance across the alveolar wall and mean chord length is calculated by the area/mean secant length.

## Supplementary References

1. Kramer EL, Mushaben EM, Pastura PA, Acciani TH, Deutsch GH, Khurana Hershey GK, et al. Early growth response-1 suppresses epidermal growth factor receptor-mediated airway hyperresponsiveness and lung remodeling in mice. *Am J Respir Cell Mol Biol*. 2009;41(4):415-25.
2. Dautel SE, Kyle JE, Clair G, Sontag RL, Weitz KK, Shukla AK, et al. Lipidomics reveals dramatic lipid compositional changes in the maturing postnatal lung. *Scientific reports*. 2017;7:40555.
3. Cox J, and Mann M. MaxQuant enables high peptide identification rates, individualized p.p.b.-range mass accuracies and proteome-wide protein quantification. *Nat Biotechnol*. 2008;26(12):1367-72.
4. Cox J, Hein MY, Lubner CA, Paron I, Nagaraj N, and Mann M. Accurate proteome-wide label-free quantification by delayed normalization and maximal peptide ratio extraction, termed MaxLFQ. *Molecular & cellular proteomics : MCP*. 2014;13(9):2513-26.

**Supplementary Figures and Tables:**

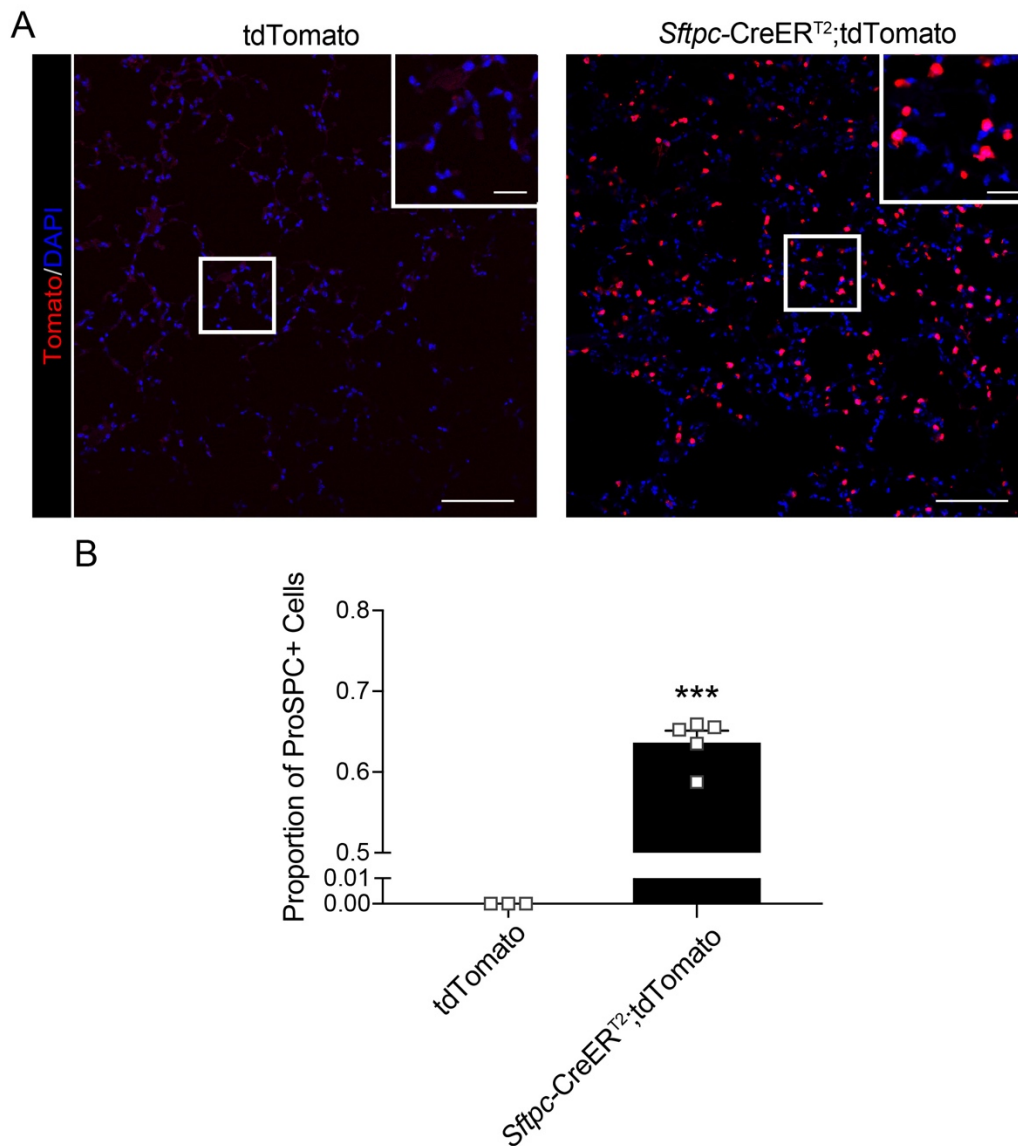

**Fig. S1. Spontaneous recombination and labeling in *Sftpc*-CreER<sup>T2</sup> mice.** A) Representative immunofluorescence images show tdTomato (red) and DAPI (blue) in frozen lung sections of Gt(ROSA)26Sor<sup>tdTomato</sup> (tdTomato) mice and *Sftpc*-CreER<sup>T2</sup>;Gt(ROSA)26Sor<sup>tdTomato</sup> (*Sftpc*-CreER<sup>T2</sup>;tdTomato) mice in the absence of tamoxifen. Scale bars = 100  $\mu$ m, inset scale bars = 20  $\mu$ m. B) Tomato<sup>+</sup>, proSPC<sup>+</sup> cells were quantitated using Nikon Elements General Analysis software

in tdTomato and *Sftpc*-CreER<sup>T2</sup>;tdTomato mice in the absence of tamoxifen. Bars represent mean  $\pm$  SE, n=3-5/group, \*\*\*p=0.0004 compared to tdTomato as determined by one-way ANOVA.

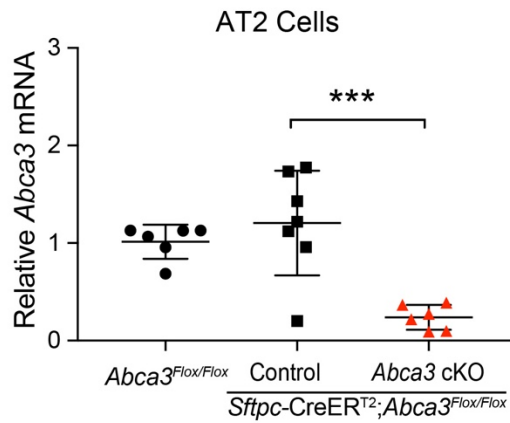

**Fig. S2. Deletion of ABCA3 in AT2 cells.** *Abca3* mRNA was measured by RT-PCR in purified AT2 cells from *Abca3*<sup>flox/flox</sup> and untreated or tamoxifen treated *Sftpc-CreER*<sup>T2</sup>; *Abca3*<sup>flox/flox</sup> (control and *Abca3* cKO) mice following 6 days of tamoxifen with an exon 3-4 probe, normalized to  $\beta$ -actin. Data are mean  $\pm$  SE, n=6-7/group, \*\*\*p=0.0004 as determined by one-way ANOVA.

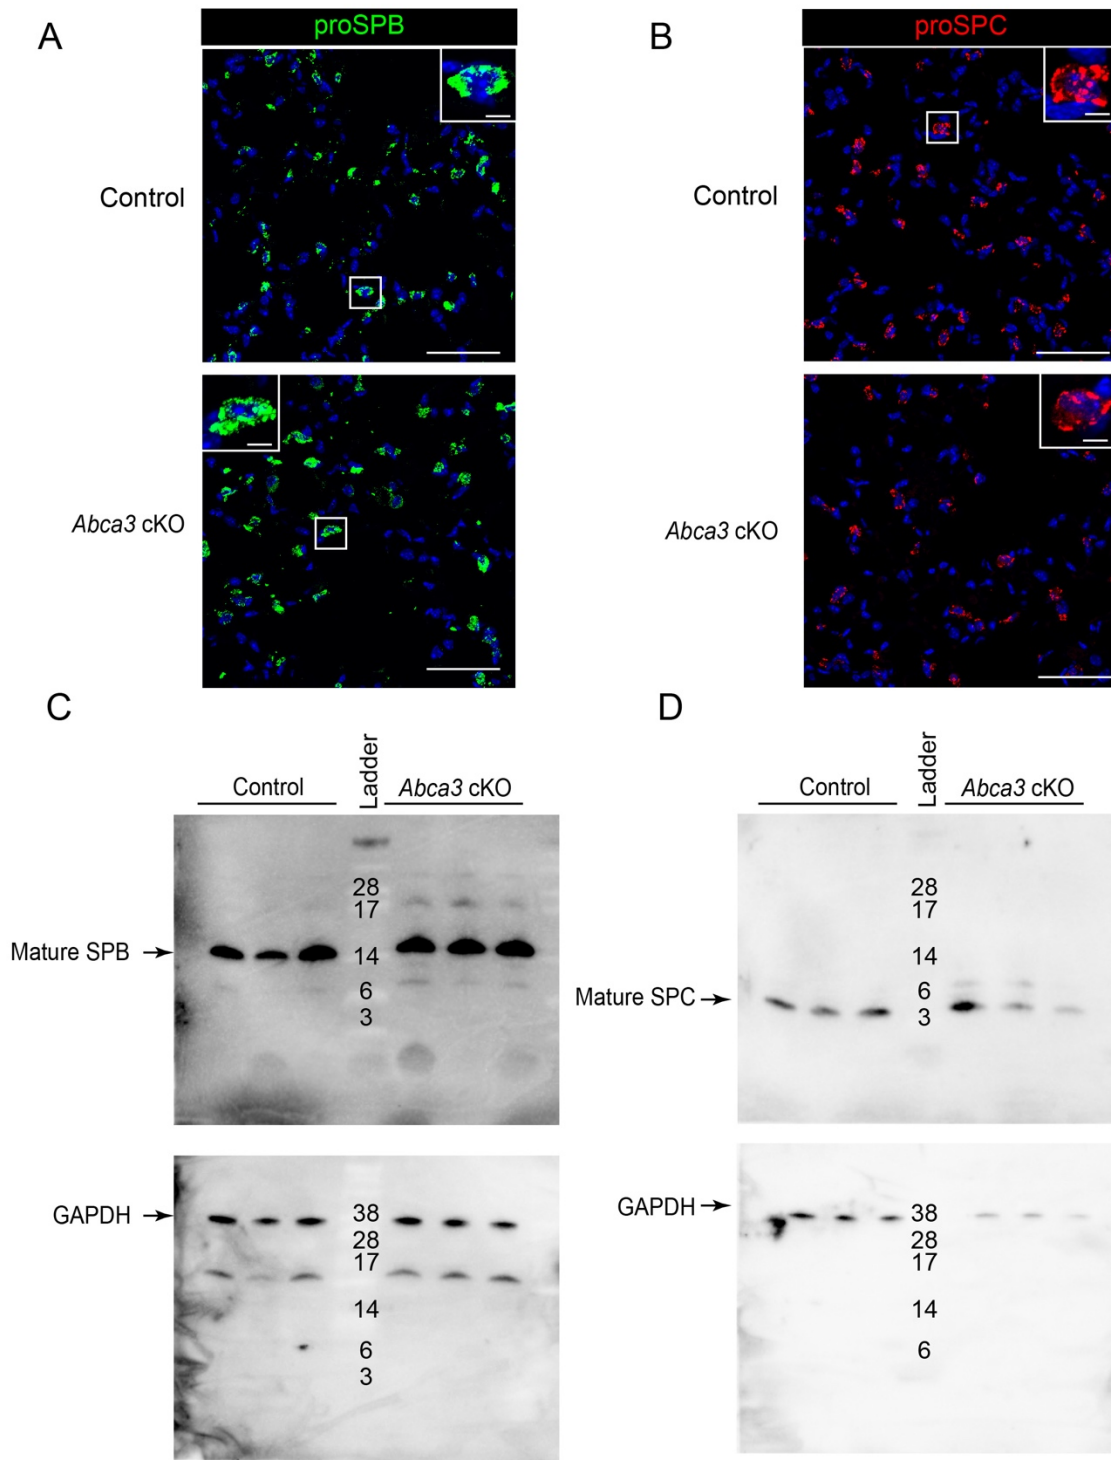

**Fig. S3.** ABCA3 is not required for normal processing of surfactant-associated proteins.

Representative immunofluorescence images of proSPB (green, **A**) and proSPC (red, **B**) in control

and *Abca3* cKO lungs treated with tamoxifen for 11 days. Scale bars = 50  $\mu\text{m}$ , inset scale bars = 5  $\mu\text{m}$ . Immunoblots for mature SPB (C) and mature SPC (D) from whole lung lysates of control and *Abca3* cKO mice treated with tamoxifen for 6 days. GAPDH served as a loading control, n=3 mice/group.



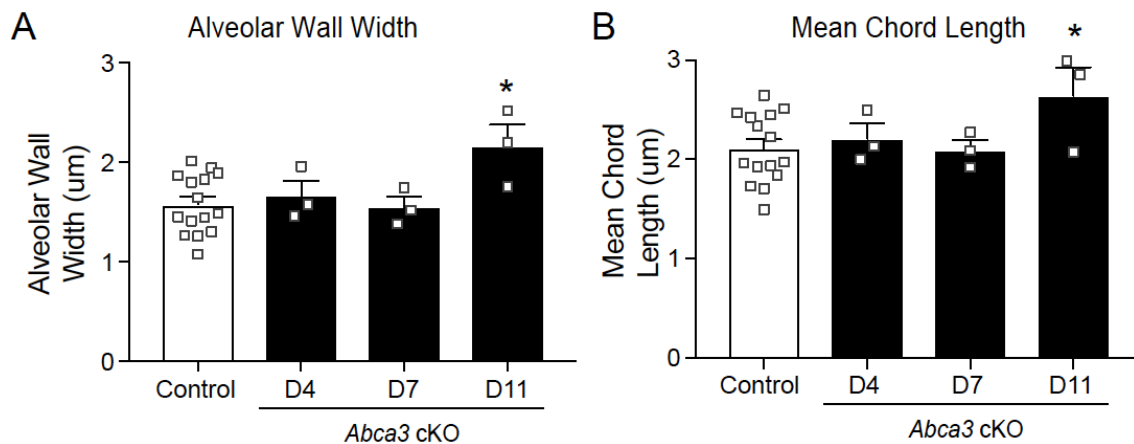

**Fig. S4. Deletion of ABCA3 causes alveolar wall thickening.** Alveolar wall dimensions were quantified in control and *Abca3* cKO mice after 4, 7 and 11 days of tamoxifen as alveolar wall width (A) and mean chord length (B) using Nikon Elements General Analysis software. Data are mean  $\pm$  SE, n=3-15/group, \*p=0.01 as determined by one-way ANOVA. Representative images are shown in Figure 1.

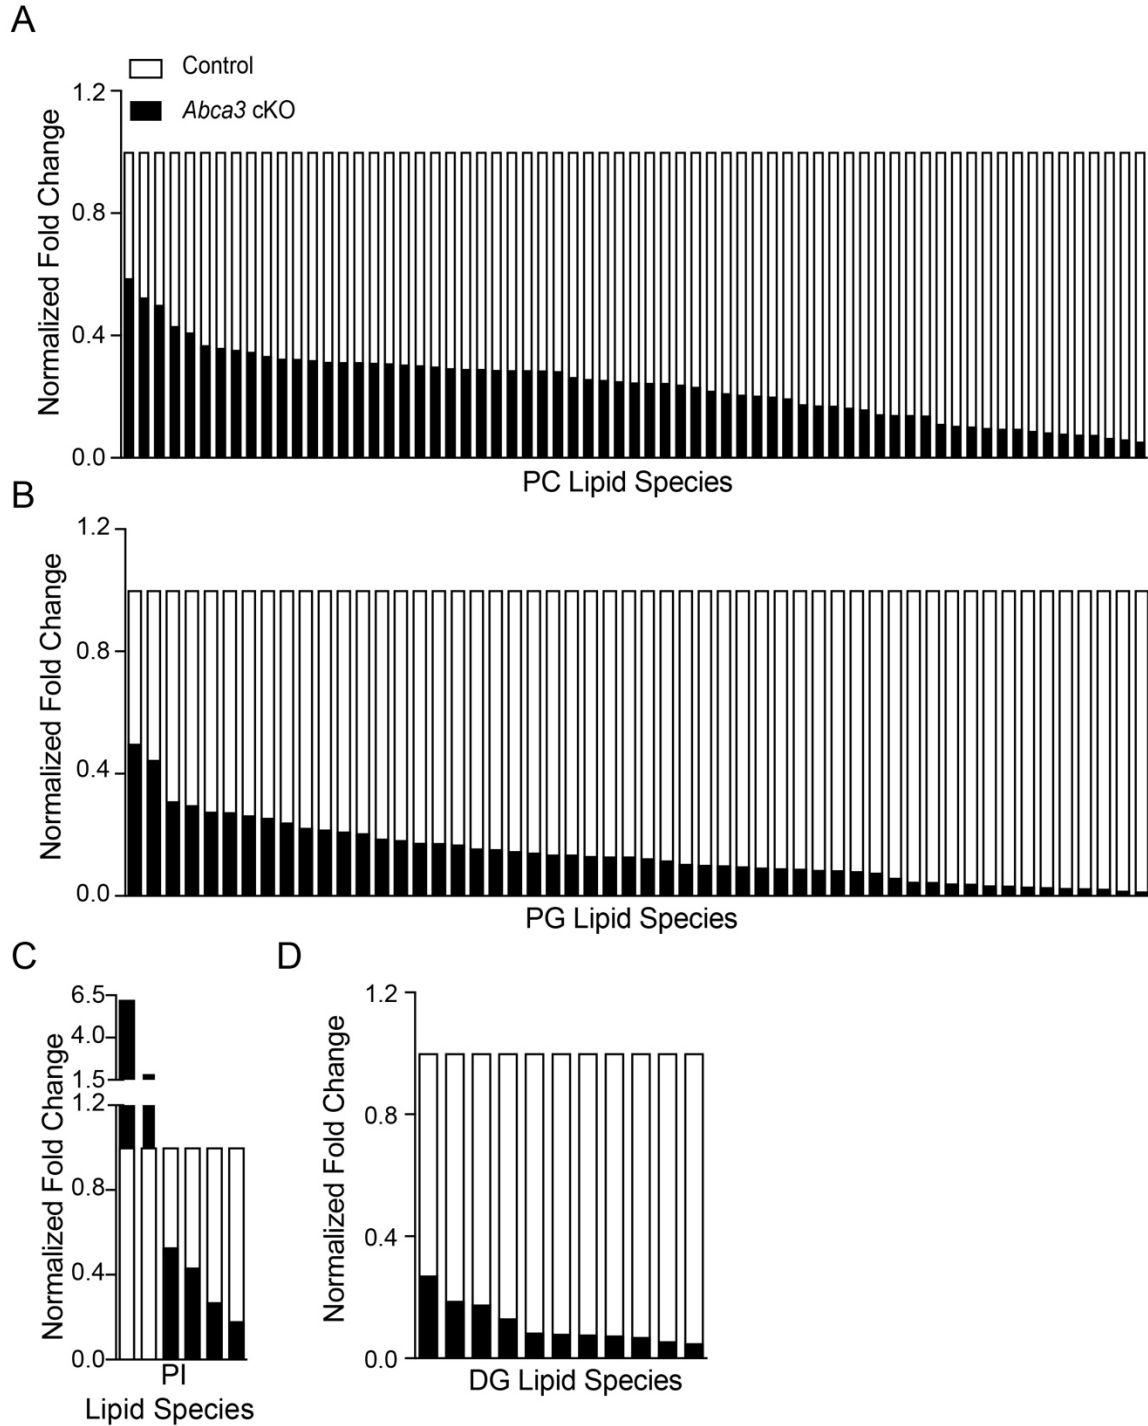

**Fig. S5. Decreased phospholipids after deletion of *Abca3* in AT2 cells.** BALF was collected from control and *Abca3* cKO mice treated with tamoxifen for 7 days for lipidomic analysis as described in the methods. Phosphatidylcholine (PC, **A**), phosphatidylglycerol (PG, **B**),

phosphatidylinositol (PI, **C**), and diacylglycerol (DG, **D**) species were determined by mass spectrometry as described in the methods. Control (open bar) and *Abca3* cKO (closed bar) are superimposed for each lipid species normalized to fold change (**Supplemental Table S1** lists the corresponding fold changes for individual lipid species). Significant changes in lipid species have a  $p < 0.01$ , fold change  $> 1.2$ .

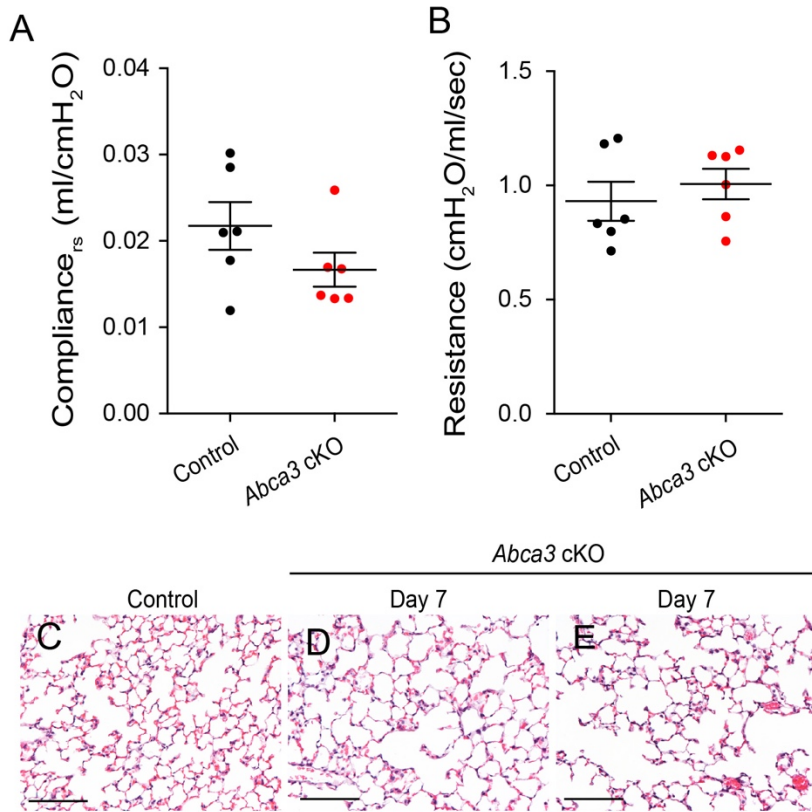

**Fig. S6. Histological and physiological lung function is maintained 7 days following the loss of *Abca3*.** Baseline tissue compliance (**A**) and elastance (**B**) in control and *Abca3* cKO mice treated with tamoxifen for 7 days. Data represent mean  $\pm$  SE, n=6. Representative lung sections from control (**C**) and *Abca3* cKO mice (**D** and **E**) are shown. Scale bars = 100  $\mu$ m.

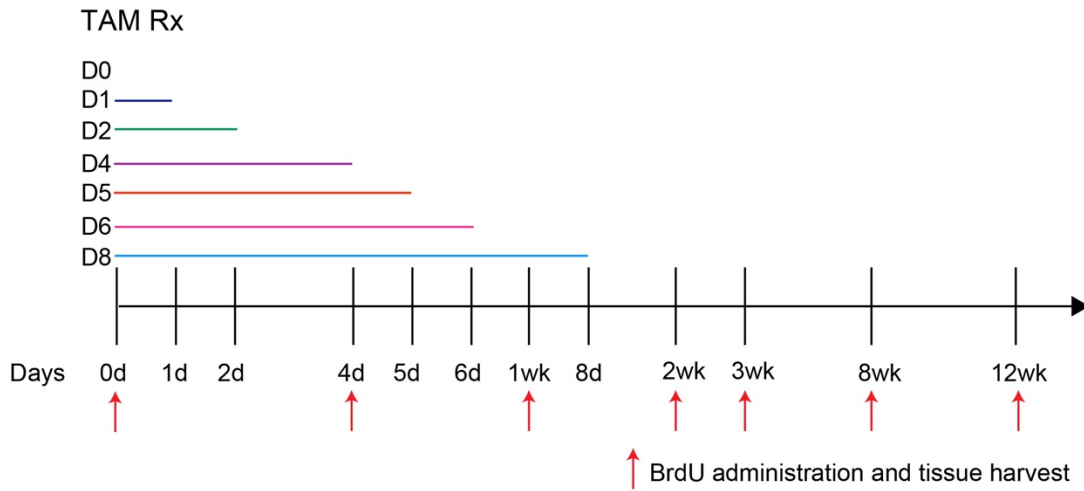

**Fig. S7. Partial deletion model of *Abca3*.** Schematic showing the timing of tamoxifen treatment (tamoxifen food) for 1-8 days (TAM Rx) followed by return to normal diet. Red arrows indicate timing of BrdU injection 2hrs prior to harvest at respective time points.

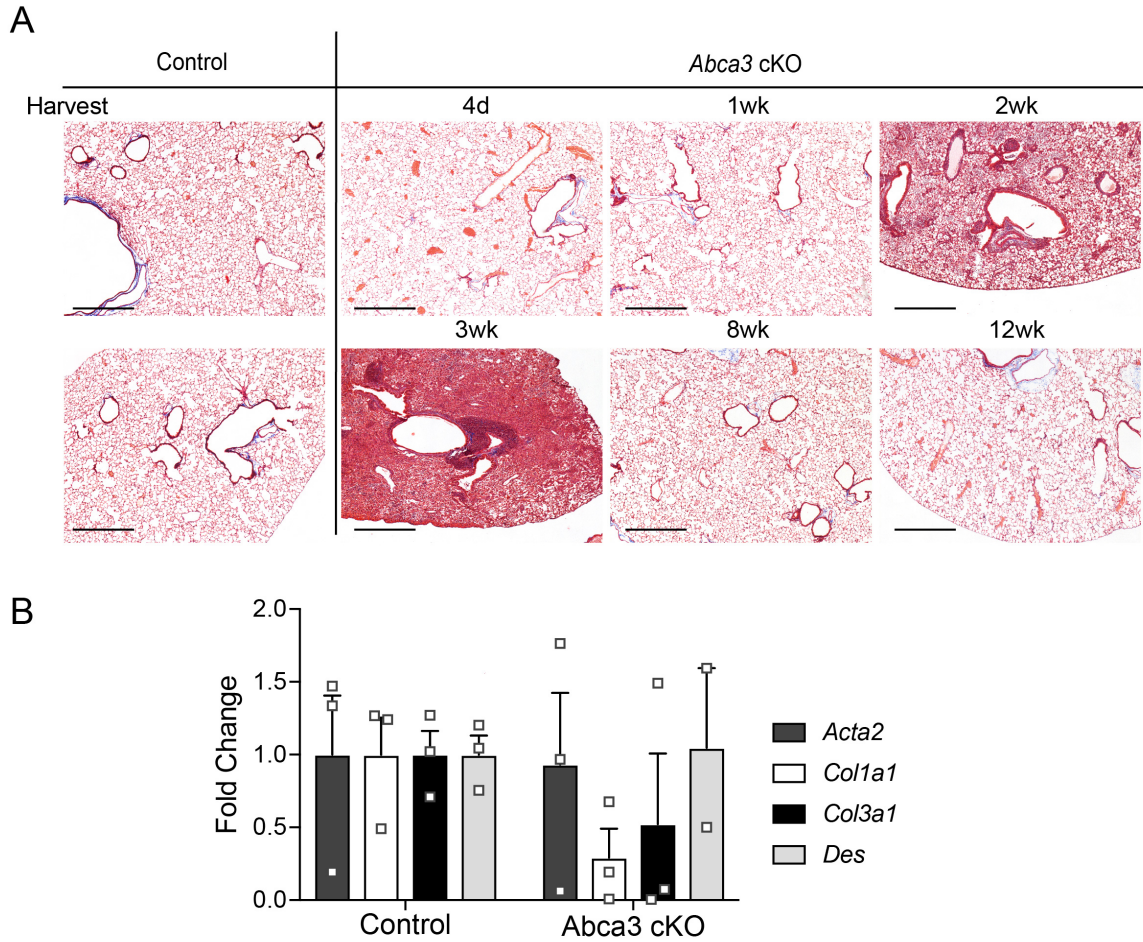

**Fig. S8. Absence of fibrosis in regions of alveolar repair in *Abca3* cKO.** **A)** Representative lung histology from control and *Abca3* cKO mice treated with tamoxifen for 4-days with tissue harvest at 4 days to 12 weeks. Lung tissue from n=3-4 mice/group were stained by Mason's trichrome for histological fibrotic analysis, scale bars, 500  $\mu$ m. **B)** *Acta2*, *Col1a1*, *Col3a1*, and *Des* were measured by RT-PCR in whole lung from control and 12 week *Abca3* cKO mice. Data represent *Acta2*, *Col1a1*, *Col3a1*, and *Des* mRNA expression with dot plot overlay, n=2-3 mice/group.

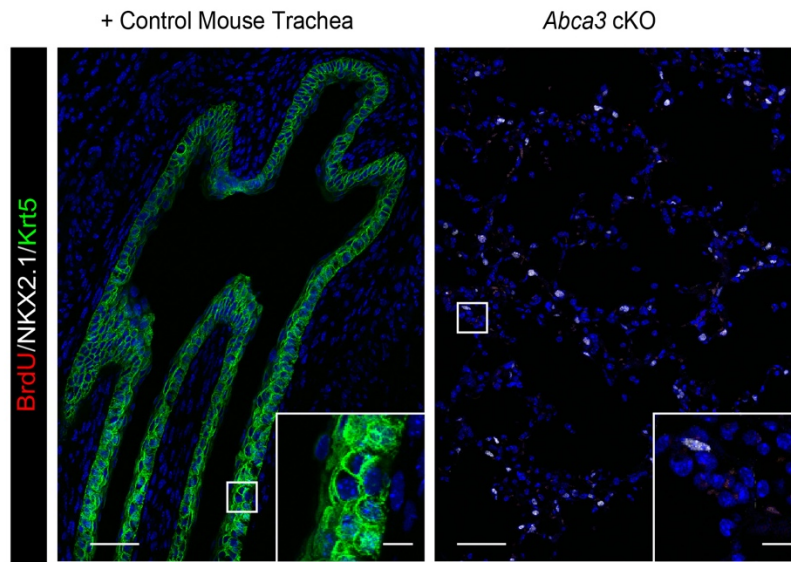

**Fig. S9. Absence of Krt5 staining in regions of alveolar repair in *Abca3* cKO.** Representative widefield tile scans of Krt5 (green), NKX2.1 (white), and BrdU (red) in mouse trachea (+ control) and *Abca3* cKO.  $n = 4$ , scale bars = 50  $\mu\text{m}$ , inset scale bars = 10  $\mu\text{m}$ .

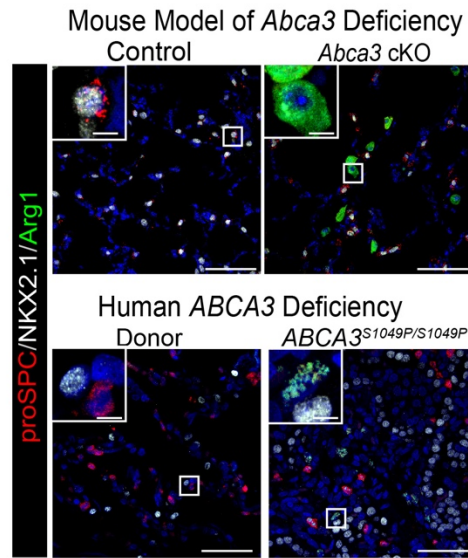

**Fig. S10. Presence of M2-like macrophages in mouse models following partial loss of *Abca3* and human patients with *ABCA3* deficiency.** Confocal immunofluorescence for proSPC (red), NKX2.1 (white), and M2-like macrophages (ARG1, green) in *Abca3* cKO and human patients with *ABCA3* deficiency. Scale bars = 50 μm, inset scale bars = 5 μm, n=3.



**Table S1. Lipid species differentially regulated in *Abca3* cKO.**

| Phosphatidylcholine Species+A2:B146       | Fold Change | Phosphatidylglycerol Species              | Fold Change |
|-------------------------------------------|-------------|-------------------------------------------|-------------|
| PC(16:0/16:0) or DPPC                     | -1.704      | PG(15:0/16:0)                             | -2.010      |
| PC(18:0/22:4)                             | -1.909      | PG(16:0/18:2);PG(16:1/18:1)               | -2.248      |
| PC(16:0/16:4)                             | -2.000      | PG(16:0/20:4)                             | -3.238      |
| PC(16:0/22:4)                             | -2.327      | PG(16:0/18:0)                             | -3.378      |
| PC(18:1/20:1)                             | -2.446      | PG(16:0/16:0)                             | -3.635      |
| PC(20:4/22:0)                             | -2.719      | PG(16:0/18:1);PG(16:1/18:0)               | -3.660      |
| PC(18:1/24:0)                             | -2.790      | PG(18:1/20:4)                             | -3.807      |
| PC(18:2/24:0)                             | -2.838      | PG(17:0/18:2);PG(17:1/18:1)               | -3.919      |
| PC(18:0/22:5)                             | -2.890      | PG(16:0/16:1);PG(14:0/18:1)               | -4.177      |
| PC(15:0/16:0)                             | -3.009      | PG(16:0/16:1)                             | -4.501      |
| PC(14:0/16:0)                             | -3.092      | PG(16:0/22:6)                             | -4.613      |
| PC(19:0/22:6)                             | -3.098      | PG(20:5/22:6)                             | -4.754      |
| PC(18:1/24:1)                             | -3.138      | PG(15:0/16:0)                             | -4.886      |
| PC(18:1/22:5)                             | -3.191      | PG(18:1/22:6)                             | -5.347      |
| PC(18:0/20:4)                             | -3.197      | PG(18:2/20:4)                             | -5.493      |
| PC(16:0/18:1);PC(16:1/18:0)               | -3.203      | PG(18:1/18:2)                             | -5.771      |
| PC(16:0/22:5);PC(18:1/20:4)               | -3.222      | PG(18:2/22:6)                             | -5.803      |
| PC(15:0/20:4)                             | -3.244      | PG(16:0/17:0)                             | -5.975      |
| PC(20:3/22:0);PC(20:1/22:2)               | -3.282      | PG(18:1/22:6)                             | -6.445      |
| PC(17:0/20:4)                             | -3.309      | PG(16:1/22:6)                             | -6.559      |
| PC(P-16:0/16:0)                           | -3.351      | PG(15:0/18:1);PG(16:0/17:1)               | -6.838      |
| PC(16:0/16:1)                             | -3.418      | PG(16:0/18:2)                             | -7.091      |
| PC(18:2/22:0)                             | -3.446      | PG(18:2/18:2)                             | -7.407      |
| PC(18:0/20:3)                             | -3.451      | PG(18:0/18:1)                             | -7.431      |
| PC(17:0/22:6)                             | -3.484      | PG(14:0/16:0)                             | -7.669      |
| PC(16:0/24:0)                             | -3.493      | PG(18:1/22:0)                             | -7.783      |
| PC(16:0/24:1);PC(18:1/22:0)               | -3.497      | PG(18:2/22:4)                             | -7.791      |
| PC(18:1/22:6)                             | -3.507      | PG(16:0/22:4)                             | -8.140      |
| PC(16:0/20:4)                             | -3.533      | PG(18:0/22:6)                             | -8.669      |
| PC(18:0/22:3)                             | -3.793      | PG(17:0/20:4)                             | -9.591      |
| PC(16:0/20:1);PC(18:0/18:1)               | -3.893      | PG(18:0/22:6)                             | -9.876      |
| PC(19:0/20:4)                             | -3.932      | PG(16:0/20:3)                             | -10.056     |
| PC(14:0/14:1)                             | -4.000      | PG(18:1/18:2)                             | -10.404     |
| PC(16:1/18:1);PC(16:0/18:2)               | -4.059      | PG(18:2/18:3)                             | -10.867     |
| PC(18:0/22:5)                             | -4.091      | PG(16:1/18:2)                             | -11.137     |
| PC(18:0/18:2)                             | -4.098      | PG(16:0/18:3);PG(16:1/18:2)               | -11.346     |
| PC(18:1/22:1)                             | -4.186      | PG(16:0/22:6)                             | -11.873     |
| PC(16:0/20:3)                             | -4.318      | PG(16:0/20:4);PG(18:2/18:2)               | -11.932     |
| PC(14:0/22:6)                             | -4.569      | PG(17:1/18:2)                             | -12.459     |
| PC(18:2/22:6)                             | -4.737      | PG(16:0/20:2);PG(18:1/18:1);PG(18:0/18:2) | -13.199     |
| PC(16:0/17:0)                             | -4.860      | PG(15:0/18:2)                             | -17.044     |
| PC(17:0/18:1)                             | -4.940      | PG(16:0/20:5);PG(16:1/20:4)               | -21.812     |
| PC(16:0/O-16:0)                           | -5.007      | PG(18:0/20:4)                             | -22.003     |
| PC(18:2/22:5)                             | -5.146      | PG(16:1/16:1)_A;PG(14:0/18:2)             | -24.969     |
| PC(16:0/18:0)                             | -5.709      | PG(15:0/16:1)                             | -25.001     |
| PC(15:0/22:6)                             | -5.866      | PG(16:1/22:6)                             | -29.287     |
| PC(18:2/20:4)                             | -5.886      | PG(16:1/18:3)                             | -30.320     |
| PC(16:0/18:3)                             | -6.100      | PG(16:1/16:1)_B;PG(16:2/16:0)             | -32.972     |
| PC(16:0/17:1)                             | -6.323      | PG(14:1/16:0)                             | -35.693     |
| PC(20:4/22:6)                             | -7.036      | PG(14:1/16:0);PG(14:0/16:1)               | -39.380     |
| PC(14:0/15:0)                             | -7.149      | PG(14:0/14:0);PG(12:0/16:0)               | -41.429     |
| PC(18:1/18:2)                             | -7.152      | PG(16:3/16:0)                             | -44.221     |
| PC(15:0/18:2)                             | -7.257      | PG(14:1/16:0)                             | -59.765     |
| PC(17:1/18:2)                             | -9.021      | PG(16:1/20:4)                             | -70.327     |
| PC(18:2/18:2)                             | -9.605      |                                           |             |
| PC(16:1/22:6)                             | -9.807      |                                           |             |
| PC(16:1/20:4)                             | -10.265     |                                           |             |
| PC(14:0/16:1)                             | -10.517     |                                           |             |
| PC(16:1/18:2);PC(16:0/18:3)               | -10.584     |                                           |             |
| PC(15:1/16:0);PC(15:0/16:1)               | -11.443     |                                           |             |
| PC(16:0/20:5)                             | -12.108     |                                           |             |
| PC(14:0/14:0)                             | -12.726     |                                           |             |
| PC(16:0/18:3);PC(16:1/18:2)               | -13.280     |                                           |             |
| PC(16:0/18:4);PC(14:0/20:4)               | -13.338     |                                           |             |
| PC(14:0/18:2);PC(16:1/16:1);PC(16:2/16:0) | -15.588     |                                           |             |
| PC(16:1/18:2)                             | -16.758     |                                           |             |
| PC(16:3/16:0)                             | -19.134     |                                           |             |
|                                           |             |                                           |             |
| Phosphatidylinositol Species              |             | Phosphatidylinositol Species              | Fold Change |
|                                           |             | PI(18:0/20:3)                             | 6.325       |
|                                           |             | PI(16:0/18:2);PI(16:1/18:1)               | 1.953       |
|                                           |             | PI(16:0/16:1)                             | -1.892      |
|                                           |             | PI(16:0/18:3)                             | -2.311      |
|                                           |             | PI(16:0/20:5)                             | -3.703      |
|                                           |             | PI(18:2/20:4)                             | -5.537      |
|                                           |             |                                           |             |
| Diaclyglycerol Species                    |             | Diaclyglycerol Species                    | Fold Change |
|                                           |             | DG(18:0/18:1/0:0)                         | -3.692      |
|                                           |             | DG(18:1/0:0/18:1)                         | -5.332      |
|                                           |             | DG(16:0/0:0/16:0)                         | -5.697      |
|                                           |             | DG(14:0/16:0/0:0)                         | -7.683      |
|                                           |             | DG(16:0/20:4/0:0)                         | -12.006     |
|                                           |             | DG(16:0/18:1/0:0)                         | -12.554     |
|                                           |             | DG(16:0/22:5/0:0);DG(18:1/20:4/0:0)       | -12.933     |
|                                           |             | DG(16:0/22:6/0:0)                         | -13.569     |
|                                           |             | DG(16:1/18:2/0:0)                         | -14.493     |
|                                           |             | DG(16:0/16:1/0:0)                         | -18.325     |
|                                           |             | DG(16:0/20:5/0:0)                         | -20.766     |

**Table S2. Primer and Antibodies**

| <b>Genotyping Primers</b>         | <b>Forward</b>                           | <b>Reverse</b>                   |
|-----------------------------------|------------------------------------------|----------------------------------|
| mouse <i>Abca3</i>                | 5'-AGC ACT TTT CCC TCT CTG GCC TTG AG-3' | 5'-TGC CCA CCC AGC ACC ATG CT-3' |
| <i>Sftpc</i> -CreER <sup>T2</sup> | 5'-ATG GGA TCT GAT CTG GGG-3'            | 5'-TTC AAC TTG CAC CAT GCC-3'    |
| tdTomato Wildtype                 | 5'-AAG GGA GCT GCA GTG GAG TA-3'         | 5'-CCG AAA ATC TGT GGG AAG TC-3' |
| tdTomato Mutant                   | 5'-GGC ATT AAA GCA GCG TAT CC-3'         | 5'-CTG TTC CTG TAC GGC ATG G-3'  |

  

| <b>Immunofluorescence Antibody</b> | <b>Species</b>             | <b>Cat#/Company</b>                     | <b>Dilution</b> |
|------------------------------------|----------------------------|-----------------------------------------|-----------------|
| ARG1                               | Sheep (FITC, no secondary) | IC5868F; R&D Systems                    | 1:50            |
| ABCA3                              | rabbit polyclonal          | WRAB-70565; Seven Hills Bioreagents     | 1:100           |
| ABCA3                              | guinea pig polyclonal      | GP985, in house                         | 1:100           |
| proSPC                             | goat polyclonal            | SC-7706; Santa Cruz                     | 1:100           |
| proSPC                             | guinea pig polyclonal      | GP992, in house                         | 1:100           |
| proSPB                             | rabbit polyclonal          | WRAB-9337, Seven Hills Bioreagents      | 1:100           |
| CD45                               | goat polyclonal            | WRAB-55522; Seven Hills Bioreagents     | 1:100           |
| SOX2                               | rabbit polyclonal          | AF114; R&D Systems                      | 1:100           |
| HOPX                               | rabbit polyclonal          | R1236; Seven Hills Bioreagents          | 1:200           |
| KRT5                               | rabbit polyclonal          | SC-30216; Santa Cruz                    | 1:200           |
| ECAD                               | rabbit polyclonal          | PRB-160-200; Biolegend                  | 1:200           |
| NKX2.1                             | guinea pig polyclonal      | 24E10; Cell Signaling Technology        | 1:300           |
| BrdU                               | rat polyclonal             | G237; in house                          | 1:500           |
| BrdU                               | mouse monoclonal IgG1      | ab6326; abcam                           | 1:50            |
| CD206                              | rat polyclonal             | G3G4; Hybridoma Bank University of Iowa | 1:500           |
|                                    |                            | MCA2235T; AbD Serotec                   | 1:1,000         |

  

| <b>AT2 Isolation Antibodies</b> | <b>Cat#</b>           |
|---------------------------------|-----------------------|
| CD45                            | BioLegend, 103103     |
| CD16/32                         | BD Bioscience, 553143 |
| Ter119                          | BioLegend, 116203     |
| CD90                            | BioLegend, 105304     |
| CD31                            | BioLegend, 102503     |

  

| <b>Taqman Probes</b>   | <b>Cat#</b>                 |
|------------------------|-----------------------------|
| <i>Abca3</i> exons 3-4 | Mm00550480_g1               |
| <i>Abca3</i> exons 5-6 | Mm01299927_g1               |
| <i>Arg1</i>            | Mm00475988_m1               |
| <i>Retnla</i>          | Mm00445109_m1               |
| <i>Mrc1</i>            | Mm01329362_m1               |
| <i>ACTB</i>            | Applied Biosystems, 4352663 |
| <i>18S</i>             | Applied Biosystems, 4352930 |
| <i>Acta2</i>           | Mm00725412_s1               |
| <i>Col1a1</i>          | MM00801666_g1               |
| <i>Col3a1</i>          | Mm00802331_m1               |
| <i>Des</i>             | MM00802455_m1               |

  

| <b>FACs Antibody</b>                  | <b>Cat#/Company</b>   |
|---------------------------------------|-----------------------|
| Live/Dead Zombie UV                   | 423107, BioLegend     |
| pan CD45 (clone 30-F11) PE-Dazzle 594 | 103145, BioLegend     |
| F4/80 APC                             | 123115, BioLegend     |
| CD11b PE                              | 101207, BioLegend     |
| CD11b PE                              | 557397, BD Bioscience |
| Ly-6G Pacific Blue                    | 127611, BioLegend     |
| CD11c PerCP/Cy5.5                     | 117327, BioLegend     |

---

**Table S3. Human *ABCA3* Deficiency**

| <b>Human <i>ABCA3</i> mutations</b> | <b>Tissue Source</b> |
|-------------------------------------|----------------------|
| MC1553P/L1553P                      | surgical biopsy      |
| W1142X/W1142X                       | surgical biopsy      |
| L982P/G1221S                        | surgical biopsy      |
| Q1591P/Q1131R                       | surgical biopsy      |
| S1049P/S1049P                       | expant tissue        |
